# Supplementary material for: An Ultrasensitive Mechanism Regulates Influenza Virus-Induced Inflammation
Source: PLoS Pathog. 2015 Jun 5;11(6):e1004856. doi: 10.1371/journal.ppat.1004856 (PMC4457877; doi:10.1371/journal.ppat.1004856)
Supplement: S3 Table — The probes assigned to module N2 were analyzed in CTen—a platform for identifying the genomic signatures of select cell type in microarray data. The enrichment score reported for each cell type is the-log10 of the false-discovery adjusted p value. (XLSX) [file ppat.1004856.s017.xlsx]

## Sheet: N2 Turquoise Module Only
	Cell Type	Enrichment Score
	Macrophage Bone Marrow Lps 24 Hrs	103.935
	Macrophage Bone Marrow Lps 6Hrs	94.1905
	Macrophage Bone Marrow Lps 2Hrs	84.4826
	Macrophage Peri Lps 7Hrs	81.2669
	Osteoclasts	79.8352
	Microglia	78.3978
	Macrophage Peri Lps 1Hrs	75.23
	Macrophage Bone Marrow	75.1573
	Macrophage Peri	72.8257
	CD8a+ Dend. Cells Myeloid	63.1752
	Granulocytes	56.8823
	RAW 264.7 Cells	49.6288
	Lymph Nodes	41.0155
	CD8a+ Dend. Cells Lymphoid	40.6041
	Spleen	35.8231
	Bone Marrow	35.3244
	Mast Cells IgE 1hr	34.9532
	B220+ Dend. Cells	34.3708
	Mast Cells	33.7139
	Mast Cells IgE 6hr	31.5203
	Mast Cells IgE	27.1999
	NK Cells	26.4376
	Bone	24.4172
	Granulo Monoprogenitor	23.2128
	Follicular B Cells	19.822
	Common Myeloid Progenitor	19.3183
	Foxp3+ Tcells	18.7705
	CD4+ T cells	18.3261
	B Cells Marginal Zone	17.8905
	B Cells (GL7 pos; Alum)	17.305
	CD8+ T cells	16.6426
	CD8+ SP Thymocytes	16.0559
	B Cells (GL7 neg; KLH)	15.7375
	B Cells (GL7 neg; Alum)	15.5498
	Osteoblast Day21	15.4328
	BA/F3	14.9178
	CD4+ SP Thymoctyes	14.0159
	B Cells (GL7 pos; KLH)	13.1049
	Hematopoietic Stem Cells	12.5427
	3T3-L1	10.1942
	Embryonic Fibroblasts	9.85745
	Osteoblast Day5	9.03369
	Osteoblast Day14	8.53554
	NIH 3T3	8.33868
	C2C12	6.51532
	Embryonic Stem Line V26 2 P16	5.85555
	Megaerythrocyte Progenitor	5.28718
	CD4+/CD8+ DP Thymocytes	5.21822
	mIMCD-3 Cells	4.70405
	Embryonic Stem Line Bruce4 P13	4.28323
	Stem Cells C3H/10T1/2	3.27422
	Placenta	3.172
	Uterus	1.56163
	Mammary Gland	1.35274
	Umbilical Cord	0.984108
	Ovary	0.761784
	Cornea	0.743116
	Neuro2a Neuroblastoma Cells	0.596293
	Liver	0.509634
	Small Intestine	0.495988
	Bladder	0.257049
	Large Intestine	0.245122
	Pancreas	0.201048
	Epidermis	0.200413
	Iris	0.183387
	Adipose White	0.132585
	Ciliary Bodies	0.125385
	Lens	0.0743467
	Adrenal Gland	0.0602633
	MIN6 cells	0.0594296
	Salivary Gland	0.049223
	Mammary Gland Non-Lactating	0.0458296
	Eyecup	0.0226539
	Stomach	0.0110773
	Retinal Pigment Epithelium	0.00647006
	Lung	0.00287709
	Dorsal Root Ganglia	0.00225818
	Cerebellum	0.00216392
	Adipose Brown	0.00189588
	Cerebral Cortex	0.00138241
	Kidney	0.000923372
	Spinal Cord	0.000832529
	Hypothalamus	0.000745501
	Hippocampus	0.000521147
	Olfactory Bulb	0.000400245
	Lacrimal Gland	0.000164859
	Nucleus Accumbens	0.00016039
	Skeletal Muscle	0.000144689
	Heart	0.000117238
	Pituitary	4.56772e-05
	Amygdala	4.37e-05
	Testis	4.23811e-05
	Cerebral Cortex Prefrontal	3.48246e-05
	Retina	2.25514e-05
	Prostate	7.22388e-06
	Dorsal Striatum	9.70924e-07
